# Supplementary material
Source: publisher figshare collection journal article supplement (https://brill.figshare.com/articles/dataset/_/5394925)
Supplement: Supplementary file 1 [file 1]

# Electrophysiological Indices of Audiovisual Speech Perception: Beyond the McGurk Effect and Speech in Noise

**Julia Irwin<sup>1,3</sup>, Trey Avery<sup>1</sup>, Lawrence Brancazio<sup>1,3</sup>, Jacqueline Turcios<sup>1,3</sup>,  
Kayleigh Ryherd<sup>1,2</sup> and Nicole Landi<sup>1,2</sup>**

<sup>1</sup> Haskins Laboratories, New Haven, CT, USA

<sup>2</sup> University of Connecticut, Storrs, CT, USA

<sup>3</sup> Southern Connecticut State University New Haven, CT, USA

## Supplementary Figures

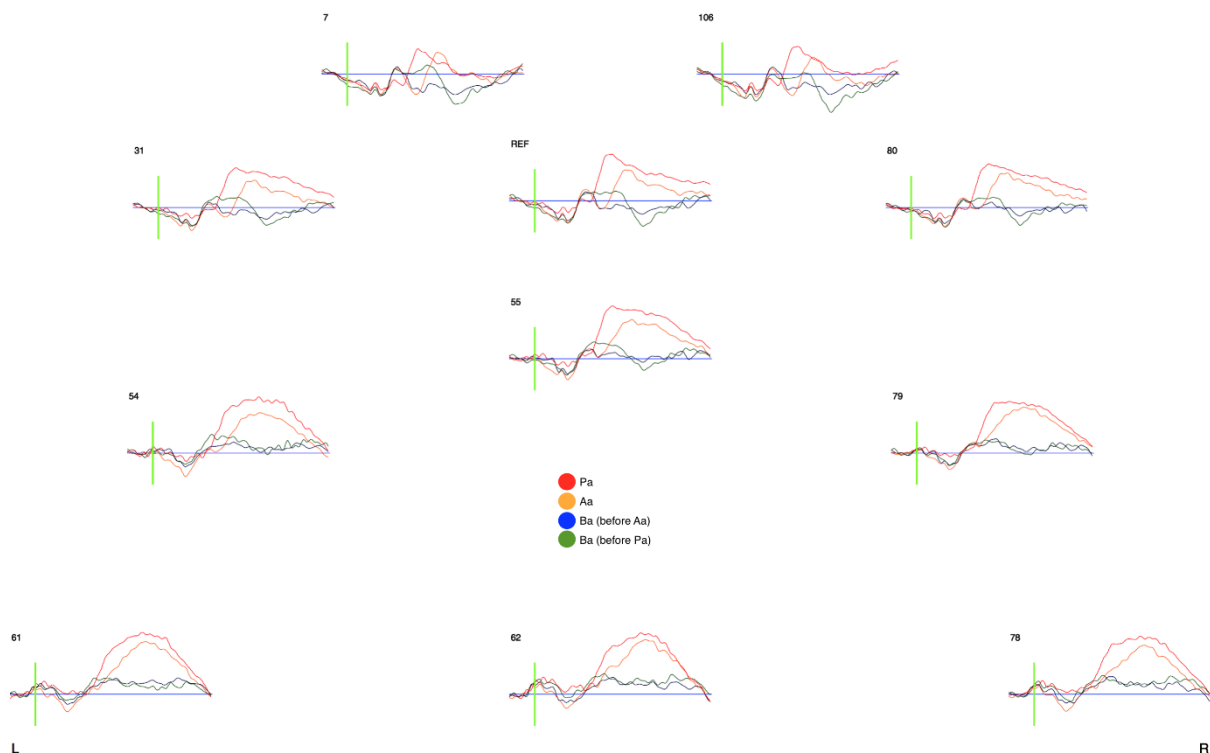

**Supplementary Figure 1.** Waveforms for individual channels in the averaged montage represented in Fig. 3 (center panels) for the AV condition. The ERP response for each speech sound is represented by a different color, indicated in the embedded legend.

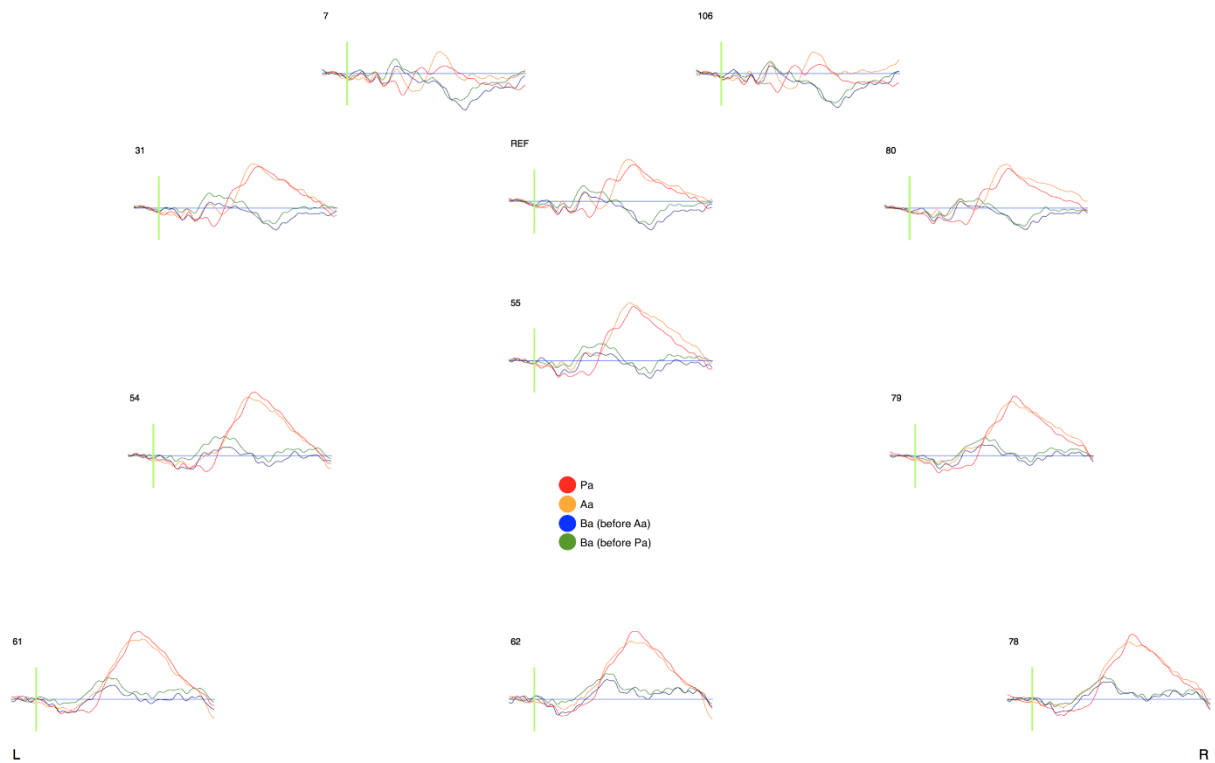

**Supplementary Figure 2.** Waveforms for individual channels in the averaged montage represented in Fig. 3 (right panels) for the PX condition. The ERP response for each speech sound is represented by a different color, indicated in the embedded legend.
